# Supplementary material for: COVID-19 vaccinations are associated with reduced fatality rates: Evidence from cross-county quasi-experiments
Source: PubMed Central journal article supplement (PMC8285768; doi:10.7189/jogh.11.05019), 2021-07-17
Supplement: jogh-11-05019-s001.pdf [file jogh-11-05019-s001.pdf]

## **SUPPLEMENTARY DOCUMENT**

- Appendix S1** Trend in the percentage of countries implemented vaccination programmes and the vaccine coverage
- Appendix S2** Sample countries, vaccine coverage, and rankings by government effectiveness, quality of transport infrastructure, and percentage of population aged 65 or older
- Appendix S3** Regression results from subgroup analyses
- Appendix S4** Regression results from analysis of dynamic relationships between vaccine coverage and the case fatality ratio
- Appendix S5** Sensitivity analysis: fixed effects model
- Appendix S6** Sensitivity analysis: using a different measure for vaccine coverage

**Appendix S1 Trend in the percentage of countries implemented vaccination programmes and the vaccine coverage**

Table S1 Percentage of countries with COVID-19 vaccination programmes and vaccine coverage

| <b>Week</b> | <b>Countries with vaccination programmes (%)</b> | <b>People who received at least one vaccine dose (as % total population of 90 countries)</b> |
|-------------|--------------------------------------------------|----------------------------------------------------------------------------------------------|
| 1-Dec-20    | 0.00                                             | 0.0000                                                                                       |
| 8-Dec-20    | 0.00                                             | 0.0000                                                                                       |
| 15-Dec-20   | 0.03                                             | 0.0004                                                                                       |
| 22-Dec-20   | 0.06                                             | 0.0146                                                                                       |
| 29-Dec-20   | 0.32                                             | 0.0611                                                                                       |
| 5-Jan-21    | 0.40                                             | 0.1589                                                                                       |
| 12-Jan-21   | 0.46                                             | 0.3058                                                                                       |
| 19-Jan-21   | 0.52                                             | 0.4861                                                                                       |
| 26-Jan-21   | 0.56                                             | 0.7250                                                                                       |
| 2-Feb-21    | 0.62                                             | 0.9905                                                                                       |
| 9-Feb-21    | 0.66                                             | 1.2725                                                                                       |
| 16-Feb-21   | 0.69                                             | 1.6588                                                                                       |
| 23-Feb-21   | 0.78                                             | 2.0150                                                                                       |
| 2-Mar-21    | 0.88                                             | 2.4069                                                                                       |
| 9-Mar-21    | 0.91                                             | 2.9365                                                                                       |
| 16-Mar-21   | 0.97                                             | 3.5384                                                                                       |
| 23-Mar-21   | 0.98                                             | 4.2497                                                                                       |
| 30-Mar-21   | 0.98                                             | 4.9584                                                                                       |
| 6-Apr-21    | 0.98                                             | 5.8413                                                                                       |
| 13-Apr-21   | 0.99                                             | 6.8850                                                                                       |
| 20-Apr-21   | 1.00                                             | 7.6538                                                                                       |

**Appendix S2 Sample countries, vaccine coverage and rankings by government effectiveness, quality of transport infrastructure, and the percentage of population aged 65 or older**

Table S2 Summary of 90 countries studies

| Country                | Case fatality ratio | Vaccine coverage | Government effectiveness | Transport quality | Share of old people |
|------------------------|---------------------|------------------|--------------------------|-------------------|---------------------|
|                        |                     |                  | Ranking: 1=low, 3=high   |                   |                     |
| Albania                | 1.81                | 0.02             | 2                        | 1                 | 2                   |
| Argentina              | 2.18                | 1.24             | 2                        | 2                 | 2                   |
| Australia              | 3.08                | 0.06             | 3                        | 3                 | 2                   |
| Austria                | 1.67                | 2.03             | 3                        | 3                 | 3                   |
| Bahrain                | 0.36                | 3.69             | 2                        | 2                 | 1                   |
| Bangladesh             | 1.45                | 0.35             | 1                        | 1                 | 1                   |
| Belarus                | 0.71                | 0.22             | 1                        | 1                 | 2                   |
| Belgium                | 2.50                | 2.09             | 3                        | 3                 | 3                   |
| Bolivia                | 4.35                | 0.34             | 1                        | 1                 | 2                   |
| Bosnia and Herzegovina | 4.18                | 0.00             | 1                        | 1                 | 3                   |
| Brazil                 | 2.69                | 1.17             | 1                        | 2                 | 2                   |
| Bulgaria               | 3.97                | 0.75             | 2                        | 2                 | 3                   |
| Canada                 | 2.07                | 2.53             | 3                        | 3                 | 3                   |
| Chile                  | 2.23                | 4.09             | 3                        | 3                 | 2                   |
| China                  | 4.74                | 0.00             | 2                        | 3                 | 2                   |
| Colombia               | 2.58                | 0.54             | 2                        | 2                 | 2                   |
| Costa Rica             | 1.34                | 0.89             | 2                        | 1                 | 2                   |
| Croatia                | 2.14                | 1.38             | 2                        | 2                 | 3                   |
| Cyprus                 | 0.51                | 1.84             | 3                        | 2                 | 2                   |
| Denmark                | 1.01                | 1.93             | 3                        | 3                 | 3                   |
| Dominican Republic     | 1.31                | 0.84             | 1                        | 1                 | 1                   |
| Ecuador                | 4.91                | 0.24             | 1                        | 2                 | 2                   |
| El Salvador            | 3.07                | 0.88             | 1                        | 1                 | 2                   |
| Estonia                | 0.93                | 2.18             | 3                        | 2                 | 3                   |
| Ethiopia               | 1.40                | 0.00             | 1                        | 1                 | 1                   |
| Finland                | 1.06                | 2.43             | 3                        | 3                 | 3                   |

---

|             |      |      |   |   |   |
|-------------|------|------|---|---|---|
| Gambia      | 2.94 | 0.07 | 1 | 1 | 1 |
| Germany     | 2.52 | 2.07 | 3 | 3 | 3 |
| Ghana       | 0.84 | 0.27 | 1 | 1 | 1 |
| Greece      | 3.00 | 1.75 | 2 | 2 | 3 |
| Guatemala   | 3.39 | 0.09 | 1 | 1 | 1 |
| Hungary     | 3.39 | 3.48 | 2 | 3 | 3 |
| India       | 1.17 | 0.80 | 2 | 2 | 1 |
| Indonesia   | 2.71 | 0.41 | 2 | 2 | 1 |
| Iran        | 2.95 | 0.06 | 1 | 2 | 1 |
| Iraq        | 1.52 | 0.06 | 1 | 1 | 1 |
| Ireland     | 1.98 | 1.78 | 3 | 3 | 2 |
| Israel      | 0.76 | 6.20 | 3 | 3 | 2 |
| Italy       | 3.02 | 1.87 | 2 | 3 | 3 |
| Jamaica     | 1.67 | 0.46 | 2 | 1 | 2 |
| Japan       | 1.78 | 0.11 | 3 | 3 | 3 |
| Jordan      | 1.21 | 0.60 | 2 | 2 | 1 |
| Kazakhstan  | 0.95 | 0.40 | 2 | 2 | 2 |
| Kenya       | 1.65 | 0.14 | 1 | 2 | 1 |
| Kuwait      | 0.56 | 1.93 | 2 | 2 | 1 |
| Latvia      | 1.85 | 1.03 | 3 | 2 | 3 |
| Lithuania   | 1.61 | 2.14 | 3 | 2 | 3 |
| Malawi      | 3.36 | 0.14 | 1 | 1 | 1 |
| Malaysia    | 0.37 | 0.23 | 3 | 2 | 1 |
| Mexico      | 9.22 | 0.88 | 1 | 2 | 2 |
| Morocco     | 1.77 | 1.27 | 1 | 1 | 1 |
| Mozambique  | 1.16 | 0.02 | 1 | 1 | 1 |
| Myanmar     | 2.25 | 0.18 | 1 | 1 | 1 |
| Netherlands | 1.19 | 2.12 | 3 | 3 | 3 |
| New Zealand | 1.00 | 0.29 | 3 | 3 | 3 |
| Norway      | 0.65 | 2.01 | 3 | 3 | 3 |
| Pakistan    | 2.15 | 0.06 | 1 | 1 | 1 |
| Panama      | 1.71 | 0.91 | 2 | 2 | 2 |
| Paraguay    | 2.14 | 0.12 | 1 | 2 | 1 |

---

|                      |      |      |   |   |   |
|----------------------|------|------|---|---|---|
| Peru                 | 3.37 | 0.24 | 2 | 1 | 2 |
| Philippines          | 1.69 | 0.12 | 2 | 2 | 1 |
| Poland               | 2.32 | 1.82 | 2 | 3 | 3 |
| Portugal             | 2.04 | 2.00 | 3 | 3 | 3 |
| Qatar                | 0.20 | 0.35 | 3 | 3 | 1 |
| Romania              | 2.57 | 1.42 | 1 | 2 | 3 |
| Russia               | 2.24 | 0.71 | 2 | 2 | 2 |
| Saudi Arabia         | 1.68 | 0.00 | 2 | 2 | 1 |
| Serbia               | 0.91 | 2.73 | 2 | 2 | 3 |
| Singapore            | 0.05 | 2.33 | 3 | 3 | 2 |
| Slovak Republic      | 2.98 | 1.80 | 2 | 2 | 3 |
| Slovenia             | 1.79 | 1.83 | 3 | 3 | 3 |
| South Africa         | 3.44 | 0.05 | 2 | 3 | 1 |
| South Korea          | 1.56 | 0.35 | 3 | 3 | 2 |
| Spain                | 2.25 | 2.05 | 3 | 3 | 3 |
| Sri Lanka            | 0.64 | 0.43 | 1 | 1 | 2 |
| Switzerland          | 1.65 | 1.58 | 3 | 3 | 3 |
| Thailand             | 0.24 | 0.09 | 2 | 2 | 2 |
| Togo                 | 0.96 | 0.19 | 1 | 1 | 1 |
| Trinidad and Tobago  | 1.72 | 0.12 | 2 | 1 | 2 |
| Tunisia              | 3.43 | 0.21 | 1 | 1 | 2 |
| Turkey               | 0.84 | 1.47 | 2 | 3 | 2 |
| Uganda               | 0.82 | 0.06 | 1 | 1 | 1 |
| Ukraine              | 2.09 | 0.11 | 1 | 1 | 3 |
| United Arab Emirates | 0.31 | 5.14 | 3 | 3 | 1 |
| United Kingdom       | 2.89 | 4.88 | 3 | 3 | 3 |
| United States        | 1.79 | 3.99 | 3 | 3 | 3 |
| Uruguay              | 1.19 | 3.11 | 3 | 1 | 2 |
| Vietnam              | 1.25 | 0.01 | 2 | 2 | 2 |
| Zambia               | 1.36 | 0.00 | 1 | 1 | 1 |
| Zimbabwe             | 4.10 | 0.19 | 1 | 1 | 1 |

Note: Case fatality ratio measures the total number of deaths among COVID-19 cases. Vaccine coverage measures the number of people who received at least one vaccine dose per 10 people in the population.

### Appendix S3 Regression results from subgroup analyses

Table S3.1 Results from regression of case fatality ratio (log), with interactions between vaccine coverage and indicator for high, median and low government effectiveness

| Predictors                                | Coef.  | Std. Err. | [95% CI]         | P>z    |
|-------------------------------------------|--------|-----------|------------------|--------|
| Vaccine coverage                          |        |           |                  |        |
| × high government effectiveness (=1)      | -0.083 | 0.027     | [-0.136, -0.031] | 0.002  |
| × median government effectiveness<br>(=1) | -0.045 | 0.034     | [-0.112, 0.023]  | 0.196  |
| × low government effectiveness (=1)       | -0.014 | 0.050     | [-0.112, 0.084]  | 0.782  |
| Government effectiveness score            | -0.075 | 0.013     | [-0.101, -0.048] | <0.001 |
| Transport infrastructure quality index    | 0.075  | 0.019     | [0.038, 0.113]   | <0.001 |
| Population aged 65 or older (%)           | 0.054  | 0.024     | [0.008, 0.100]   | 0.022  |
| Hospital beds per 1,000 population        | 0.001  | 0.038     | [-0.073, 0.075]  | 0.986  |
| Gross domestic product per capita (log)   | -0.042 | 0.016     | [-0.073, -0.011] | 0.008  |
| Government response stringency index      | -0.010 | 0.014     | [-0.037, 0.018]  | 0.492  |
| Time to containment policy (weeks)        | 0.045  | 0.018     | [0.010, 0.081]   | 0.012  |
| Total tests for COVID-19 per 100 people   | 0.001  | 0.001     | [0.000, 0.003]   | 0.031  |
| Confirmed cases per 100 people last week  | 0.015  | 0.015     | [-0.016, 0.045]  | 0.344  |
| Asia                                      | -0.059 | 0.297     | [-0.641, 0.522]  | 0.841  |
| Europe                                    | 0.098  | 0.456     | [-0.796, 0.993]  | 0.829  |
| North America                             | 0.782  | 0.383     | [0.031, 1.534]   | 0.041  |
| South America                             | 0.602  | 0.359     | [-0.101, 1.305]  | 0.093  |
| Oceania                                   | 0.696  | 0.516     | [-0.315, 1.707]  | 0.177  |

Note: The sample had 90 countries and 2,200 country-week observations. The standard errors were clustered at the country level. The model included country random effects.

Table S3.2 Results from regression of case fatality ratio (log), with interactions between vaccine coverage and indicator for high, median and low transport infrastructure quality

| Predictors                               | Coef.  | Std. Err. | [95% CI]         | P>z    |
|------------------------------------------|--------|-----------|------------------|--------|
| Vaccine coverage                         |        |           |                  |        |
| × high transport quality (=1)            | -0.081 | 0.027     | [-0.133, -0.029] | 0.002  |
| × median transport quality (=1)          | -0.048 | 0.038     | [-0.123, 0.026]  | 0.205  |
| × low transport quality (=1)             | -0.034 | 0.038     | [-0.108, 0.040]  | 0.371  |
| Government effectiveness score           | -0.076 | 0.014     | [-0.102, -0.049] | <0.001 |
| Transport infrastructure quality index   | 0.076  | 0.019     | [0.038, 0.114]   | <0.001 |
| Population aged 65 or older (%)          | 0.054  | 0.024     | [0.007, 0.100]   | 0.023  |
| Hospital beds per 1,000 population       | 0.001  | 0.038     | [-0.073, 0.075]  | 0.986  |
| Gross domestic product per capita (log)  | -0.042 | 0.016     | [-0.073, -0.010] | 0.009  |
| Government response stringency index     | -0.010 | 0.014     | [-0.038, 0.017]  | 0.474  |
| Time to containment policy (weeks)       | 0.045  | 0.018     | [0.010, 0.080]   | 0.012  |
| Total tests for COVID-19 per 100 people  | 0.001  | 0.001     | [0.000, 0.003]   | 0.045  |
| Confirmed cases per 100 people last week | 0.015  | 0.016     | [-0.017, 0.046]  | 0.354  |
| Asia                                     | -0.062 | 0.297     | [-0.643, 0.520]  | 0.836  |
| Europe                                   | 0.098  | 0.457     | [-0.797, 0.993]  | 0.83   |
| North America                            | 0.781  | 0.384     | [0.029, 1.533]   | 0.042  |
| South America                            | 0.598  | 0.359     | [-0.106, 1.302]  | 0.096  |
| Oceania                                  | 0.694  | 0.516     | [-0.317, 1.705]  | 0.178  |

Note: The sample had 90 countries and 2,200 country–week observations. The standard errors were clustered at the country level. The model included country random effects.

Table S3.3 Results from regression of case fatality ratio (log), with interactions between vaccine coverage and indicator for high, median and low share of population aged 65 or older

| Predictors                               | Coef.  | Std. Err. | [95% CI]         | P>z    |
|------------------------------------------|--------|-----------|------------------|--------|
| Vaccine coverage                         |        |           |                  |        |
| × high share of old people (=1)          | -0.064 | 0.033     | [-0.129, 0.002]  | 0.056  |
| × median share of old people (=1)        | -0.081 | 0.026     | [-0.132, -0.030] | 0.002  |
| × low share of old people (=1)           | -0.084 | 0.029     | [-0.142, -0.027] | 0.004  |
| Government effectiveness score           | -0.076 | 0.014     | [-0.102, -0.049] | <0.001 |
| Transport infrastructure quality index   | 0.075  | 0.019     | [0.037, 0.113]   | <0.001 |
| Population aged 65 or older (%)          | 0.054  | 0.024     | [0.008, 0.100]   | 0.023  |
| Hospital beds per 1,000 population       | 0.001  | 0.038     | [-0.073, 0.075]  | 0.978  |
| Gross domestic product per capita (log)  | -0.041 | 0.016     | [-0.073, -0.010] | 0.01   |
| Government response stringency index     | -0.010 | 0.014     | [-0.037, 0.018]  | 0.487  |
| Time to containment policy (weeks)       | 0.045  | 0.018     | [0.010, 0.080]   | 0.012  |
| Total tests for COVID-19 per 100 people  | 0.001  | 0.001     | [0.000, 0.003]   | 0.046  |
| Confirmed cases per 100 people last week | 0.015  | 0.016     | [-0.016, 0.046]  | 0.343  |
| Asia                                     | -0.063 | 0.296     | [-0.644, 0.518]  | 0.832  |
| Europe                                   | 0.089  | 0.456     | [-0.804, 0.982]  | 0.845  |
| North America                            | 0.774  | 0.383     | [0.023, 1.526]   | 0.043  |
| South America                            | 0.596  | 0.358     | [-0.106, 1.297]  | 0.096  |
| Oceania                                  | 0.697  | 0.515     | [-0.312, 1.706]  | 0.176  |

Note: The sample had 90 countries and 2,200 country–week observations. The standard errors were clustered at the country level. The model included country random effects.



## Appendix S4 Regression results from analysis of dynamic relationships between vaccine coverage and the case fatality ratio

Table S4 Results from regression of case fatality ratio (log), with intervals of vaccine coverage

| Predictors                                                                              | Coef.  | Std. Err. | [95% CI]         | P>z    |
|-----------------------------------------------------------------------------------------|--------|-----------|------------------|--------|
| Interval of vaccine coverage (no. of vaccinated people per 10 people in the population) |        |           |                  |        |
| (reference group: 0)                                                                    |        |           |                  |        |
| <0.05                                                                                   | -0.060 | 0.037     | [-0.132, 0.012]  | 0.101  |
| 0.05 – 0.1                                                                              | -0.054 | 0.035     | [-0.122, 0.014]  | 0.120  |
| 0.1 – 0.2                                                                               | -0.043 | 0.030     | [-0.102, 0.017]  | 0.159  |
| 0.2 – 0.4                                                                               | -0.027 | 0.029     | [-0.084, 0.029]  | 0.347  |
| 0.4 – 0.8                                                                               | -0.038 | 0.035     | [-0.107, 0.030]  | 0.272  |
| 0.8 – 1.6                                                                               | -0.127 | 0.046     | [-0.218, -0.036] | 0.006  |
| 1.6 – 3.2                                                                               | -0.212 | 0.065     | [-0.339, -0.085] | 0.001  |
| ≥3.2                                                                                    | -0.313 | 0.103     | [-0.515, -0.110] | 0.002  |
| Government effectiveness score                                                          | -0.075 | 0.014     | [-0.102, -0.049] | <0.001 |
| Transport infrastructure quality index                                                  | 0.075  | 0.019     | [0.037, 0.113]   | <0.001 |
| Population aged 65 or older (%)                                                         | 0.054  | 0.023     | [0.008, 0.100]   | 0.021  |
| Hospital beds per 1,000 population                                                      | 0.003  | 0.037     | [-0.071, 0.076]  | 0.944  |
| Gross domestic product per capita (log)                                                 | -0.043 | 0.016     | [-0.074, -0.011] | 0.008  |
| Government response stringency index                                                    | -0.006 | 0.013     | [-0.031, 0.020]  | 0.676  |
| Time to containment policy (weeks)                                                      | 0.045  | 0.018     | [0.010, 0.080]   | 0.013  |
| Total tests for COVID-19 per 100 people                                                 | 0.001  | 0.001     | [0.000, 0.003]   | 0.043  |
| Confirmed cases per 100 people last week                                                | 0.021  | 0.016     | [-0.010, 0.052]  | 0.185  |
| Asia                                                                                    | -0.060 | 0.300     | [-0.648, 0.529]  | 0.843  |
| Europe                                                                                  | 0.091  | 0.458     | [-0.807, 0.989]  | 0.842  |
| North America                                                                           | 0.781  | 0.387     | [0.023, 1.539]   | 0.043  |
| South America                                                                           | 0.593  | 0.361     | [-0.114, 1.301]  | 0.1    |
| Oceania                                                                                 | 0.731  | 0.515     | [-0.277, 1.740]  | 0.155  |

Note: The sample had 90 countries and 2,200 country–week observations. The standard errors were clustered at the country level. The model included country random effects.

## Appendix S5 Sensitivity analysis: fixed effects model

For robustness checks, all models discussed in the main text were re-run by using fixed-effects instead of random-effects models. Variables that did not change over time could not be estimated by the fixed-effects model and were denoted as omitted in Table E1. The results indicated that different assumptions about country effects did not change the main conclusions drawn from the current study.

Table S5.1 Results from fixed-effects regression for COVID-19 case fatality ratio (log)

| Predictors                               | Coef.     | Std. Err. | [95% CI]         | P>t   |
|------------------------------------------|-----------|-----------|------------------|-------|
| Vaccine coverage                         | -0.077    | 0.025     | [-0.127, -0.028] | 0.003 |
| Government effectiveness score           | (omitted) |           |                  |       |
| Transport infrastructure quality index   | (omitted) |           |                  |       |
| Population aged 65 or older (%)          | (omitted) |           |                  |       |
| Hospital beds per 1,000 population       | (omitted) |           |                  |       |
| Gross domestic product per capita (log)  | (omitted) |           |                  |       |
| Government response stringency index     | -0.011    | 0.014     | [-0.039, 0.017]  | 0.432 |
| Time to containment policy (weeks)       | (omitted) |           |                  |       |
| Total tests for COVID-19 per 100 people  | 0.001     | 0.001     | [0.000, 0.003]   | 0.043 |
| Confirmed cases per 100 people last week | 0.017     | 0.015     | [-0.013, 0.048]  | 0.262 |
| Asia                                     | (omitted) |           |                  |       |
| Europe                                   | (omitted) |           |                  |       |
| North America                            | (omitted) |           |                  |       |
| South America                            | (omitted) |           |                  |       |
| Oceania                                  | (omitted) |           |                  |       |

Note: The sample had 90 countries and 2,200 country-week observations. The standard errors were clustered at the country level.

Table S5.2 Results from fixed-effects regressions of case fatality ratio, with interactions between vaccine coverage and indicator for country characteristics

| Predictors                             | Coef.  | Std. Err. | [95% CI]         | P>t   |
|----------------------------------------|--------|-----------|------------------|-------|
| Vaccine coverage                       |        |           |                  |       |
| × high government effectiveness (=1)   | -0.084 | 0.027     | [-0.137, -0.031] | 0.002 |
| × median government effectiveness (=1) | -0.045 | 0.034     | [-0.113, 0.023]  | 0.192 |
| × low government effectiveness (=1)    | -0.014 | 0.050     | [-0.114, 0.086]  | 0.780 |
| Vaccine coverage                       |        |           |                  |       |
| × high transport quality (=1)          | -0.082 | 0.026     | [-0.134, -0.030] | 0.003 |
| × median transport quality (=1)        | -0.049 | 0.038     | [-0.125, 0.026]  | 0.196 |
| × low transport quality (=1)           | -0.032 | 0.038     | [-0.107, 0.042]  | 0.392 |
| Vaccine coverage                       |        |           |                  |       |
| × high share of old people (=1)        | -0.065 | 0.033     | [-0.131, 0.001]  | 0.054 |
| × median share of old people (=1)      | -0.082 | 0.026     | [-0.133, -0.031] | 0.002 |
| × low share of old people (=1)         | -0.084 | 0.029     | [-0.142, -0.026] | 0.005 |

Note: The sample had 90 countries and 2,200 country–week observations. The standard errors were clustered at the country level. All three models included variables for country characteristics, nonpharmaceutical interventions, and continent indicators described in Table 1 in the main text.

Table S5.3 Results from fixed-effects regression of case fatality ratio (log), with intervals of vaccine coverage

| Predictors                                                                              | Coef.  | Std. Err. | [95% CI]         | P>t   |
|-----------------------------------------------------------------------------------------|--------|-----------|------------------|-------|
| Interval of vaccine coverage (no. of vaccinated people per 10 people in the population) |        |           |                  |       |
| (reference group: 0)                                                                    |        |           |                  |       |
| <0.05                                                                                   | -0.060 | 0.036     | [-0.133, 0.012]  | 0.100 |
| 0.05 – 0.1                                                                              | -0.054 | 0.035     | [-0.123, 0.014]  | 0.120 |
| 0.1 – 0.2                                                                               | -0.043 | 0.030     | [-0.104, 0.017]  | 0.156 |
| 0.2 – 0.4                                                                               | -0.028 | 0.029     | [-0.085, 0.030]  | 0.344 |
| 0.4 – 0.8                                                                               | -0.039 | 0.035     | [-0.109, 0.030]  | 0.264 |
| 0.8 – 1.6                                                                               | -0.128 | 0.046     | [-0.220, -0.036] | 0.007 |
| 1.6 – 3.2                                                                               | -0.214 | 0.065     | [-0.342, -0.085] | 0.001 |
| ≥3.2                                                                                    | -0.318 | 0.103     | [-0.522, -0.114] | 0.003 |

Note: The sample had 90 countries and 2,200 country-week observations. The standard errors were clustered at the country level. The model included variables for country characteristics, nonpharmaceutical interventions, and continent indicators described in Table 1 in the main text.

### Appendix S6 Sensitivity analysis: using a different measure for vaccine coverage

For robustness checks, we used a different measure for vaccine coverage and re-run all models discussed in the main text. Vaccine coverage was redefined as the number of people who received all doses prescribed by the vaccination protocol per 10 people in the population. We discovered that the results remained consistent with those from the original models.

Table S6.1 Results from random-effects regression for COVID-19 case fatality ratio (log)

| Predictors                                              | Coef.  | Std. Err. | [95% CI]         | P>z    |
|---------------------------------------------------------|--------|-----------|------------------|--------|
| Vaccine coverage, restricted to fully vaccinated people | -0.069 | 0.032     | [-0.132, -0.007] | 0.030  |
| Government effectiveness score                          | -0.076 | 0.014     | [-0.103, -0.050] | <0.001 |
| Transport infrastructure quality index                  | 0.075  | 0.019     | [0.038, 0.113]   | 0.000  |
| Population aged 65 or older (%)                         | 0.053  | 0.024     | [0.007, 0.099]   | 0.025  |
| Hospital beds per 1,000 population                      | 0.001  | 0.038     | [-0.072, 0.075]  | 0.972  |
| Gross domestic product per capita (log)                 | -0.040 | 0.016     | [-0.071, -0.009] | 0.011  |
| Government response stringency index                    | -0.010 | 0.014     | [-0.038, 0.018]  | 0.466  |
| Time to containment policy (weeks)                      | 0.045  | 0.018     | [0.010, 0.080]   | 0.012  |
| Total tests for COVID-19 per 100 people                 | 0.001  | 0.001     | [0.000, 0.003]   | 0.096  |
| Confirmed cases per 100 people last week                | 0.005  | 0.014     | [-0.022, 0.033]  | 0.716  |
| Asia                                                    | -0.070 | 0.297     | [-0.652, 0.513]  | 0.814  |
| Europe                                                  | 0.111  | 0.457     | [-0.784, 1.006]  | 0.808  |
| North America                                           | 0.779  | 0.383     | [0.029, 1.529]   | 0.042  |
| South America                                           | 0.600  | 0.359     | [-0.103, 1.303]  | 0.094  |

Oceania 0.692 0.517 [-0.320, 1.705] 0.180

Note: The sample had 90 countries and 2,200 country-week observations. The standard errors were clustered at the country level.

Table S6.2 Results from random-effects regressions of case fatality ratio, with interactions between vaccine coverage and indicator for country characteristics

| Predictors                                             | Coef.  | Std. Err. | [95% CI]         | P>z   |
|--------------------------------------------------------|--------|-----------|------------------|-------|
| Vaccine coverage restricted to fully vaccinated people |        |           |                  |       |
| × high government effectiveness (=1)                   | -0.073 | 0.035     | [-0.143, -0.004] | 0.039 |
| × median government effectiveness (=1)                 | -0.046 | 0.047     | [-0.139, 0.046]  | 0.328 |
| × low government effectiveness (=1)                    | -0.029 | 0.051     | [-0.130, 0.071]  | 0.567 |
| Vaccine coverage restricted to fully vaccinated people |        |           |                  |       |
| × high transport quality (=1)                          | -0.074 | 0.035     | [-0.142, -0.006] | 0.033 |
| × median transport quality (=1)                        | -0.033 | 0.050     | [-0.131, 0.065]  | 0.514 |
| × low transport quality (=1)                           | -0.014 | 0.047     | [-0.107, 0.078]  | 0.764 |
| Vaccine coverage restricted to fully vaccinated people |        |           |                  |       |
| × high share of old people (=1)                        | -0.051 | 0.063     | [-0.176, 0.073]  | 0.421 |

|                                   |        |       |                  |       |
|-----------------------------------|--------|-------|------------------|-------|
| × median share of old people (=1) | -0.065 | 0.029 | [-0.122, -0.008] | 0.025 |
| × low share of old people (=1)    | -0.083 | 0.041 | [-0.162, -0.003] | 0.043 |

Note: The sample had 90 countries and 2,200 country–week observations. The standard errors were clustered at the country level. All three models included variables for country characteristics, nonpharmaceutical interventions, and continent indicators described in Table 1 in the main text.

Table S6.3 Results from random-effects regression of case fatality ratio (log), with intervals of vaccine coverage

| Predictors                                                                                  | Coef.  | Std. Err. | [95% CI]         | P>z   |
|---------------------------------------------------------------------------------------------|--------|-----------|------------------|-------|
| Interval of vaccine coverage, restricted to fully vaccinated people<br>(reference group: 0) |        |           |                  |       |
| <0.05                                                                                       | -0.036 | 0.032     | [-0.099, 0.026]  | 0.253 |
| 0.05 – 0.1                                                                                  | -0.040 | 0.029     | [-0.097, 0.017]  | 0.168 |
| 0.1 – 0.2                                                                                   | -0.052 | 0.038     | [-0.127, 0.023]  | 0.177 |
| 0.2 – 0.4                                                                                   | -0.021 | 0.039     | [-0.097, 0.055]  | 0.595 |
| 0.4 – 0.8                                                                                   | -0.092 | 0.056     | [-0.202, 0.018]  | 0.100 |
| 0.8 – 1.6                                                                                   | -0.158 | 0.066     | [-0.287, -0.030] | 0.016 |
| 1.6 – 3.2                                                                                   | -0.212 | 0.077     | [-0.364, -0.060] | 0.006 |
| ≥3.2                                                                                        | -0.304 | 0.130     | [-0.558, -0.050] | 0.019 |

Note: The sample had 90 countries and 2,200 country–week observations. The standard errors were clustered at the country level. The model included country random effects. The model included variables for country characteristics,



nonpharmaceutical interventions, and continent indicators described in Table 1 in the main text.
